# Supplementary material for: Average structure and local configuration of excess oxygen in UO2+x
Source: PubMed Central journal article supplement — Sci Rep. 2014 Mar 19;4:4216. doi: 10.1038/srep04216 (PMC3958918; doi:10.1038/srep04216), 2014-03-19

**Title: Average structure and local configuration of excess oxygen in  $\text{UO}_{2+x}$**

**Authors:** Jianwei Wang,<sup>1, 3,\*</sup> Rodney C. Ewing,<sup>2,3</sup> and Udo Becker<sup>3</sup>

**Affiliations:**

<sup>1</sup>Department of Geology and Geophysics, Center for Computation and Technology, Louisiana State University, Baton Rouge, Louisiana 70803-0001, USA

<sup>2</sup>Department of Geological and Environmental Sciences, Stanford University Stanford, California 94305-2115, USA

<sup>3</sup>Department of Earth and Environmental Sciences, University of Michigan, Ann Arbor, Michigan 48109-1005, USA

\*Jianwei Wang

Department of Geology and Geophysics

Louisiana State University

E235 Howe-Russell Building

Baton Rouge, Louisiana 70803, USA

Phone: 225-578-5532

Fax: 225-578-2302

Email: Jianwei@lsu.edu

**Supplementary information:**

Figure S1: The atomic probability contour maps of  $\text{U}^{5+}$  (green) overlaid on the maps of  $\text{U}^{4+}$  (blue) and oxygen (red) projected on the (001) plane.  $\text{U}^{6+}$  atoms are not observed. As shown, at low temperature up to 800 K (a and b), the  $\text{U}^{5+}$  are localized near but not necessarily nearest neighboring to the interstitial oxygen atoms during the time scale of the simulations. Above 1200 K (c and d), the locations of  $\text{U}^{5+}$  are distributed over the most (c) or all (d) U lattice sites.

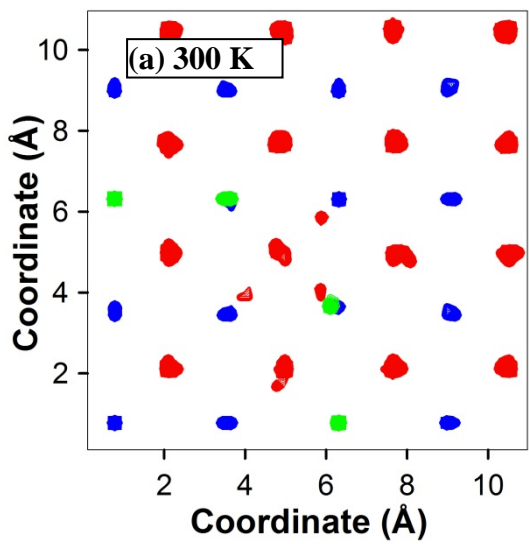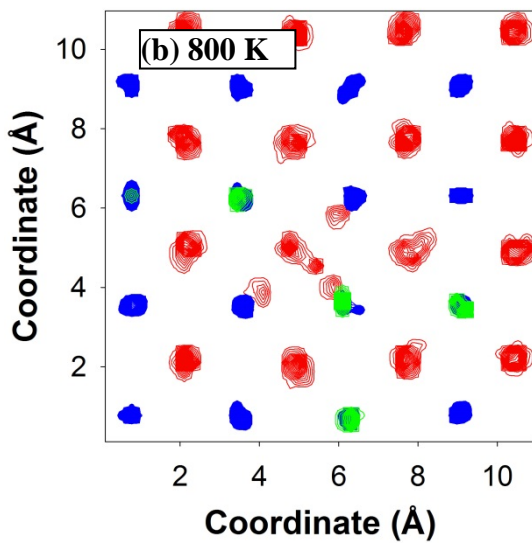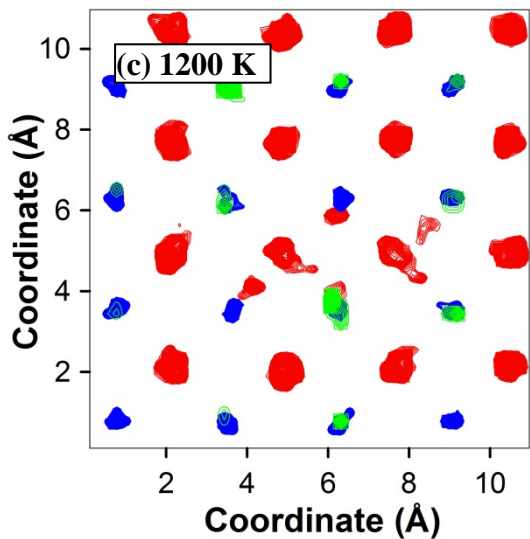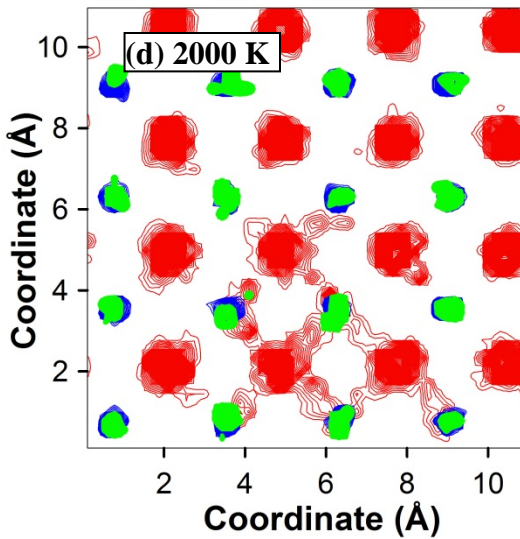

Figure S2: Probability distribution of the angle between  $\langle 111 \rangle$  and the displacing direction of interstitial oxygen atom from the 4b site, averaged over the trajectory. Small values of angle are those interstitial oxygen atoms displaced in  $\langle 111 \rangle$  directions and larger values are those in  $\langle 110 \rangle$  directions. These distributions are used to calculate the ratio between  $\langle 110 \rangle$  and  $\langle 111 \rangle$  oxygen interstitials.

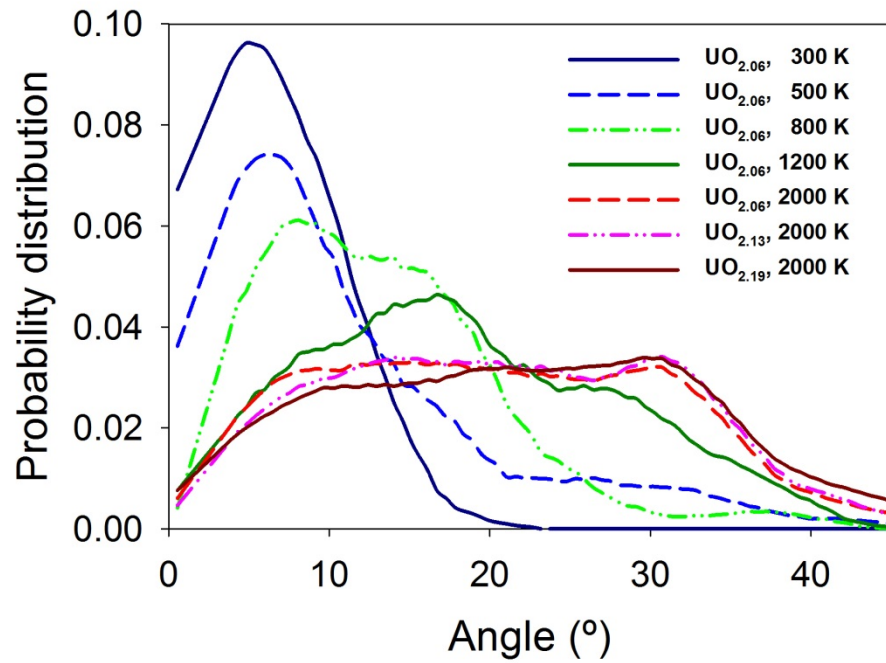

Supplement: srep04216-s1.pdf [file srep04216-s1.pdf]
